# Supplementary material for: A stable europium metal–organic framework as a dual-functional luminescent sensor for quantitatively detecting temperature and humidity
Source: Royal Society of Chemistry journal article supplement (doi:10.1039/c6dt03812c), 2016-01-01
Supplement: c6dt03812c1.pdf [file c6dt03812c1.pdf]

## Supporting Information

### **A stable europium metal-organic framework as a dual-functional luminescent sensor for quantitatively detecting temperature and humidity**

Dongbo Wang, Qinghua Tan, Lingjuan Liu and Zhiliang Liu<sup>\*</sup>

College of Chemistry and Chemical Engineering, Key Lab of Nanoscience and Nanotechnology,  
Inner Mongolia University, Hohhot, 010021, China \*Corresponding author.

Fax: +86-471-4994375

Tel: +86-471- 4994375

\*Email: [cezlliu@imu.edu.cn](mailto:cezlliu@imu.edu.cn)

## Experimental Details

All the reagents were commercially available and used as provided without further purification.

Fourier transform infrared (FTIR) spectra (KBr disk method) were collected with a TENSOR 27 FT-IR spectrophotometer in the wavenumber range from 4000 to 450  $\text{cm}^{-1}$ . PXRD was carried out on an EMPY-REAN PANALYTICAL apparatus. TGA was carried out on a SDTQ600 thermal analyser; the samples were analysed under an  $\text{N}_2$  atmosphere and at a heating rate of  $10^\circ\text{C min}^{-1}$  over the temperature range 40–800 $^\circ\text{C}$ . Room-temperature photoluminescence(PL) spectra for the powdered solid samples were collected on a Hitachi F-7000 fluorescence spectrophotometer. The PMT voltage was 700 V, the excitation slit was 2.5 nm and the emission slit was 5 nm. The temperature-dependent emission spectra were recorded on a Horiba Fluorolog-3-tau spectrophotometer.

### Synthesis of $\{[\text{Eu}_2(\text{L})_3 \cdot (\text{H}_2\text{O})_2 \cdot (\text{DMF})_2] \cdot 16\text{H}_2\text{O}\}_n$

A mixture containing  $\text{Eu}(\text{NO}_3)_3 \cdot 6\text{H}_2\text{O}$  (0.0446 g, 0.1 mmol),  $\text{H}_2\text{L}$  (0.0398 g, 0.1 mmol),  $\text{H}_2\text{O}$  (5 mL), and DMF (3 mL) was placed in a Teflon-lined stainless steel vessel (23 mL). After being sonicated in air for 10 min, the resulting suspension was heated at 120  $^\circ\text{C}$  for 3 days and then cooled to room temperature at a rate of  $5^\circ\text{C/h}$ . Rod-shaped yellow crystals suitable for single-crystal X-ray diffraction were collected by filtration, washed with water and dried in air to afford 42 mg of product. Anal. Calcd. for  $\text{C}_{72}\text{H}_{86}\text{Eu}_2\text{N}_{14}\text{O}_{32}$ : C, 44.04; H, 4.42; N, 9.98. Found: C, 43.74; H, 4.53; N, 9.87. IR ( $\text{cm}^{-1}$ , KBr): 3368(vs), 1661(vs), 1590(s), 1537(s), 1497(vs), 1467(m), 1399(vs), 1323(s), 1254(s), 956(m), 818 (s), 784(m).

### Crystal data collection and refinement

Diffraction intensity data were collected at 293 K on a Bruker APEX II diffractometer equipped with a CCD area detector and graphite-monochromated Mo  $\text{K}\alpha$  radiation ( $\lambda = 0.71073 \text{ \AA}$ ). Empirical absorption corrections were applied using the SADABS program.<sup>1</sup>The structure was solved by direct methods and was refined by the full-matrix least-squares method on  $F^2$  using the SHELXTL-97 program; with all non-hydrogen atoms were refined with anisotropic thermal parameters.<sup>2</sup>Crystallographic data for **1** have been deposited at the Cambridge Crystallographic Data Center with the deposition number of CCDC 1436108. Experimental details for the structure analysis of **1** are given in Table 1. Selected bond lengths and angles are given in Table 2.

**Table 1** Crystal data and structure refinements for compound **1**

| <b>Compound</b>                              | <b>1</b>                                                                        |
|----------------------------------------------|---------------------------------------------------------------------------------|
| Formula                                      | C <sub>72</sub> H <sub>86</sub> Eu <sub>2</sub> N <sub>14</sub> O <sub>32</sub> |
| Mr                                           | 1963.45                                                                         |
| Crystal system                               | Monoclinic                                                                      |
| Space group                                  | P2/c                                                                            |
| a, Å                                         | 8.1737 (5)                                                                      |
| b, Å                                         | 15.0092 (10)                                                                    |
| c, Å                                         | 37.574 (2)                                                                      |
| α, deg                                       | 90                                                                              |
| β, deg                                       | 101.828 (2)                                                                     |
| γ, deg                                       | 90                                                                              |
| Volume, Å <sup>3</sup>                       | 4511.7(5)                                                                       |
| Z                                            | 4                                                                               |
| D <sub>c</sub> ,mg/m <sup>3</sup>            | 1.445                                                                           |
| μ,mm <sup>-1</sup>                           | 1.463                                                                           |
| F(000)                                       | 1996                                                                            |
| Reflections collected                        | 72739                                                                           |
| Independent reflections                      | 7782                                                                            |
| Data/restraints/parameters                   | 7782 / 1345 / 543                                                               |
| Goodness-of-fit on F <sup>2</sup>            | 1.033                                                                           |
| Final R indices [I>2σ (I)]                   | R1 = 0.0640, wR2 = 0.1437                                                       |
| Final R indices [all data]                   | R1 = 0.1218, wR2 = 0.1671                                                       |
| Largest diff. peak / hole,e. Å <sup>-3</sup> | 1.619/ -1.280                                                                   |

**Table 2** The selected bond lengths and angles

|                   |            |                     |            |
|-------------------|------------|---------------------|------------|
| Eu(1)-O(8)        | 2.321(6)   | O(5)-Eu(1)-O(1)     | 125.33(19) |
| Eu(1)-O(4)#1      | 2.388(5)   | O(6)-Eu(1)-O(1)     | 72.60(19)  |
| Eu(1)-O(5)        | 2.412(5)   | O(3)-Eu(1)-O(1)     | 52.18(18)  |
| Eu(1)-O(6)        | 2.419(6)   | O(8)-Eu(1)-O(7)#2   | 78.0(2)    |
| Eu(1)-O(3)        | 2.470(5)   | O(4)#1-Eu(1)-O(7)#2 | 117.15(19) |
| Eu(1)-O(1)        | 2.500(5)   | O(5)-Eu(1)-O(7)#2   | 87.7(2)    |
| Eu(1)-O(7)#2      | 2.501(6)   | O(6)-Eu(1)-O(7)#2   | 79.3(2)    |
| Eu(1)-O(2)        | 2.547(6)   | O(3)-Eu(1)-O(7)#2   | 147.0(2)   |
| Eu(1)-O(4)#2      | 2.576(5)   | O(1)-Eu(1)-O(7)#2   | 147.0(2)   |
| O(4)-Eu(1)#1      | 2.388(5)   | O(8)-Eu(1)-O(2)     | 78.1(2)    |
| O(4)-Eu(1)#3      | 2.576(5)   | O(4)#1-Eu(1)-O(2)   | 124.61(18) |
| O(7)-Eu(1)#3      | 2.501(6)   | O(5)-Eu(1)-O(2)     | 52.38(19)  |
| O(8)-Eu(1)-O(4)#1 | 154.5(2)   | O(6)-Eu(1)-O(2)     | 147.5(2)   |
| O(8)-Eu(1)-O(5)   | 130.5(2)   | O(3)-Eu(1)-O(2)     | 76.34(19)  |
| O(4)#1-Eu(1)-O(5) | 73.01(19)  | O(1)-Eu(1)-O(2)     | 125.72(19) |
| O(8)-Eu(1)-O(6)   | 79.7(2)    | O(7)#2-Eu(1)-O(2)   | 73.2(2)    |
| O(4)#1-Eu(1)-O(6) | 83.24(19)  | O(8)-Eu(1)-O(4)#2   | 122.2(2)   |
| O(5)-Eu(1)-O(6)   | 143.9(2)   | O(4)#1-Eu(1)-O(4)#2 | 66.4(2)    |
| O(8)-Eu(1)-O(3)   | 83.8(2)    | O(5)-Eu(1)-O(4)#2   | 78.57(19)  |
| O(4)#1-Eu(1)-O(3) | 90.46(18)  | O(6)-Eu(1)-O(4)#2   | 66.94(18)  |
| O(5)-Eu(1)-O(3)   | 83.55(19)  | O(3)-Eu(1)-O(4)#2   | 154.01(18) |
| O(6)-Eu(1)-O(3)   | 124.25(19) | O(1)-Eu(1)-O(4)#2   | 127.23(18) |
| O(8)-Eu(1)-O(1)   | 80.2(2)    | O(7)#2-Eu(1)-O(4)#2 | 51.14(18)  |
| O(4)#1-Eu(1)-O(1) | 76.70(18)  | O(2)-Eu(1)-O(4)#2   | 106.36(18) |

Symmetry transformations used to generate equivalent atoms: #1: -x, y, -z+1/2; #2 : x+1, -y, z-1/2 ; #3: x-1, -y, z+1/2; #4 : -x+3, -y+1, -z.

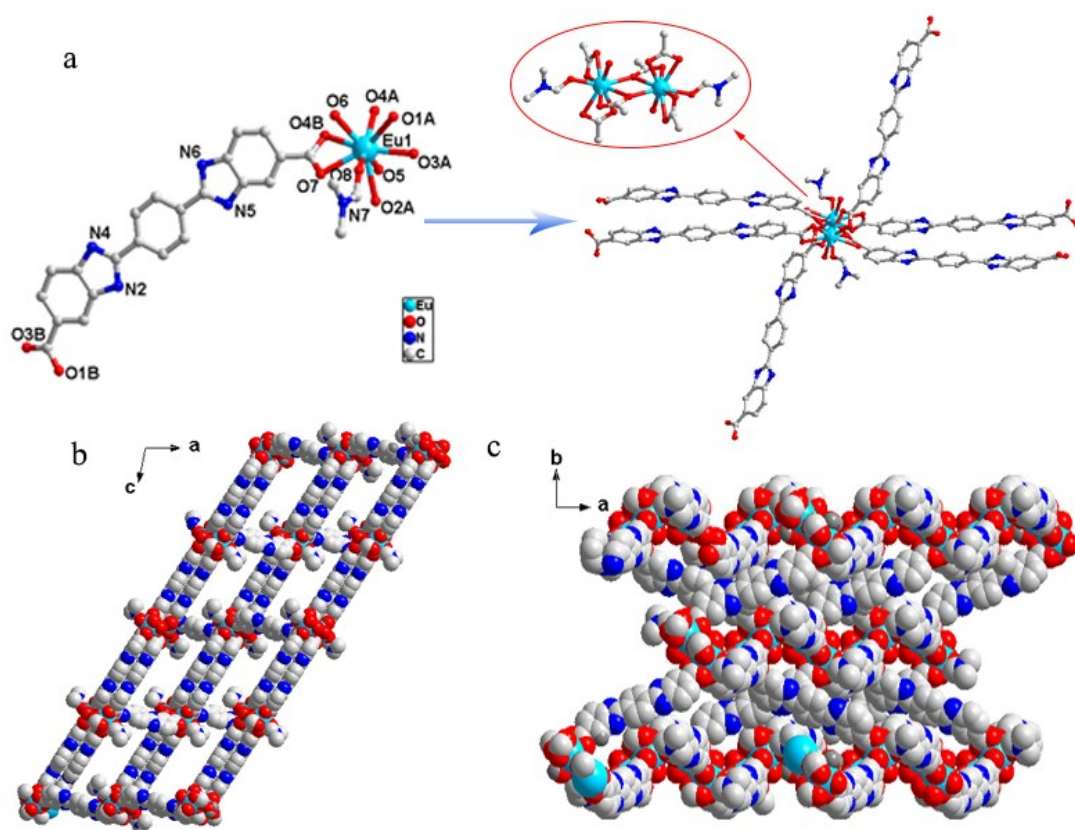

**Fig. S1** (a) Coordination environment of  $\text{Eu}^{3+}$  in **1**; (b) Space fill model of **1** along  $b$ -axis ; (c) Space fill model of **1** along  $c$ -axis . Symmetry codes: A:  $1 + x, -y, -1/2 + z$ ; B:  $-x, y, -1/2 - z$ .

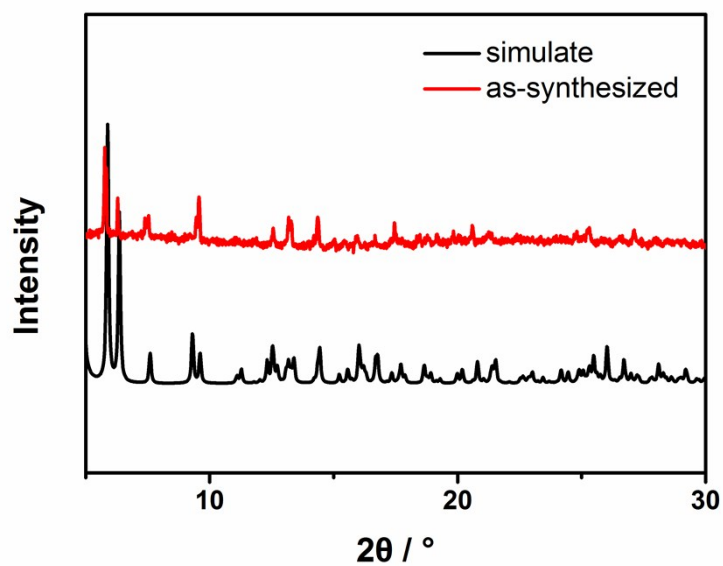

**Fig. S2** The simulated patterns and experimental powder XRD patterns of **1**.

| Object 1↵ | Object 2↵ | Length↵ |
|-----------|-----------|---------|
| O6↵       | O1↵       | 2.726↵  |
| N2↵       | O9↵       | 2.861↵  |
| N5↵       | O12↵      | 2.736↵  |
| O9↵       | O7↵       | 2.964↵  |
| O10↵      | N6↵       | 2.811↵  |
| O11↵      | N1↵       | 3.084↵  |
| O13↵      | O11↵      | 2.863↵  |
| O13↵      | O2↵       | 2.912↵  |
| O15↵      | O9↵       | 2.735↵  |
| O15↵      | O13↵      | 2.888↵  |
| O16↵      | O14↵      | 2.783↵  |
| O16↵      | N4↵       | 3.059↵  |

**Fig. S3** The hydrogen bonding table of **1**.

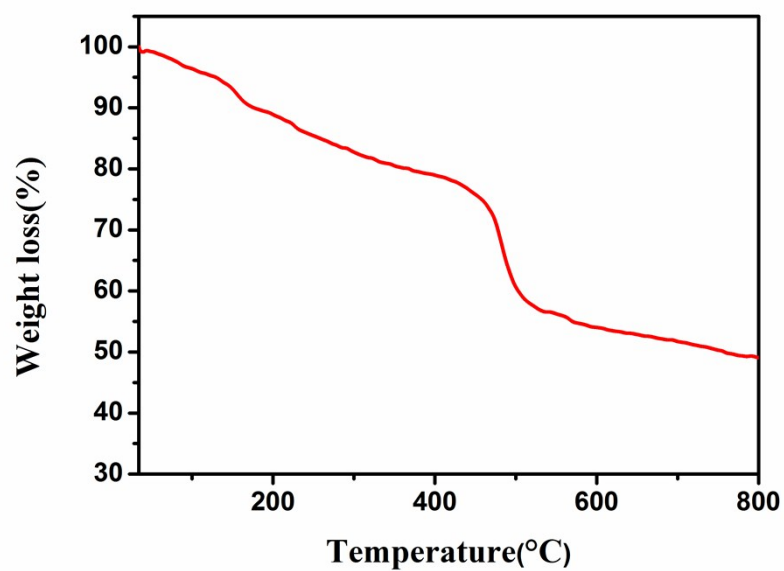

**Fig. S4** Thermogravimetric analyses trace of **1**.

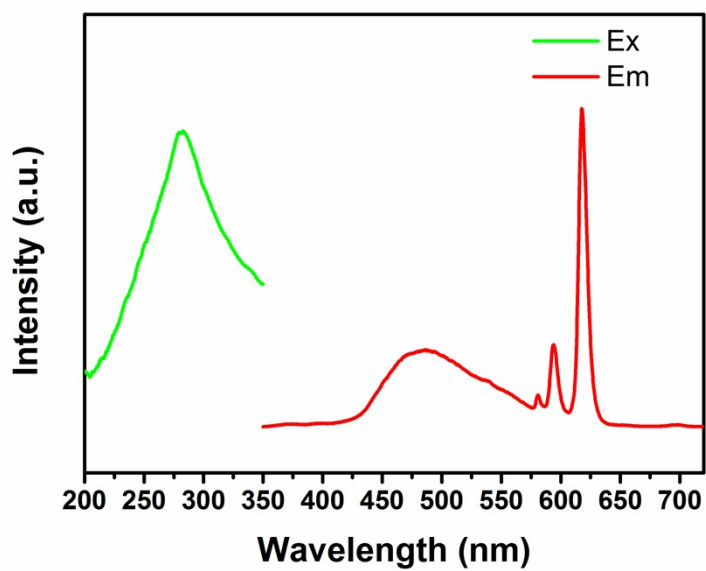

**Fig. S5** The excitation spectra and emission spectra upon excitation at 280 nm for **1**.

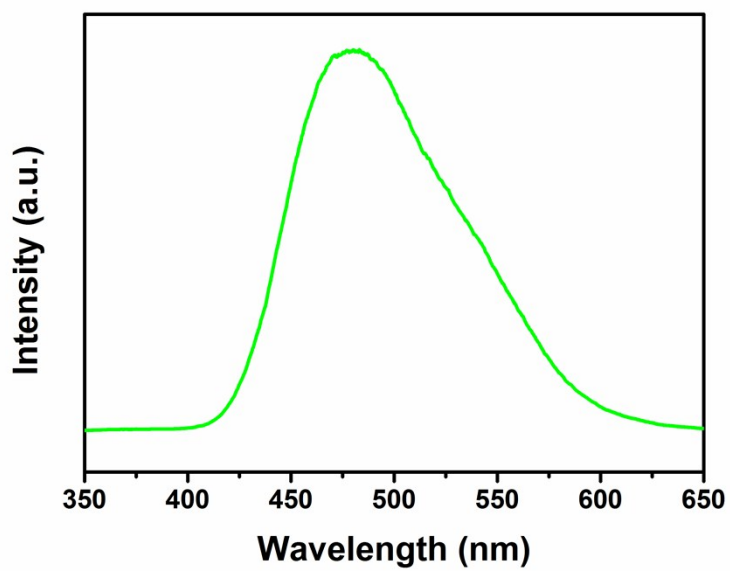

**Fig. S6** The emission spectra for ligand H<sub>2</sub>L upon excitation at 280 nm.

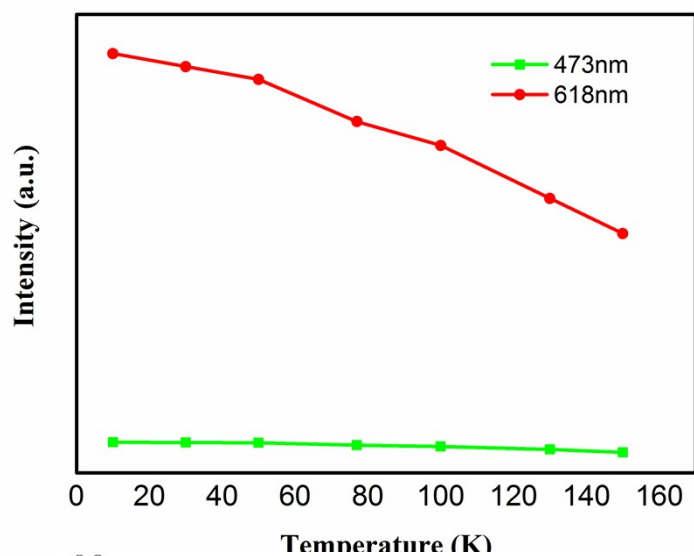

**Fig. S7** Different rate of intensity at 473 nm.

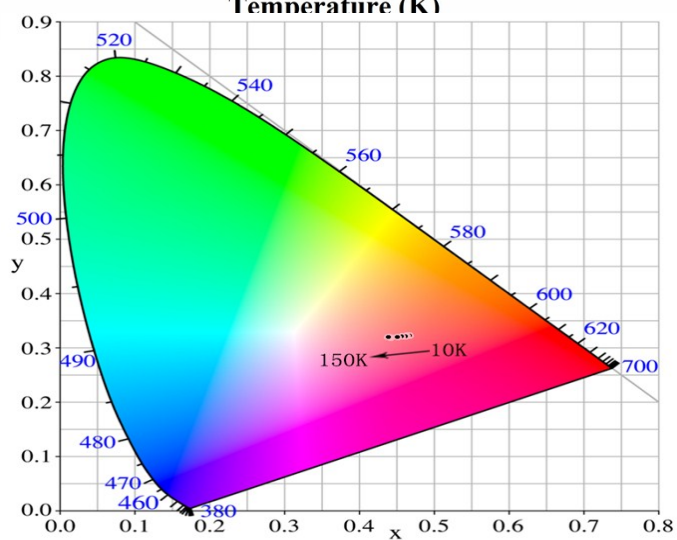

decreasing  
luminescent  
nm and 618



**Fig. S8** CIE of temperature-dependent luminescence color of **1**.

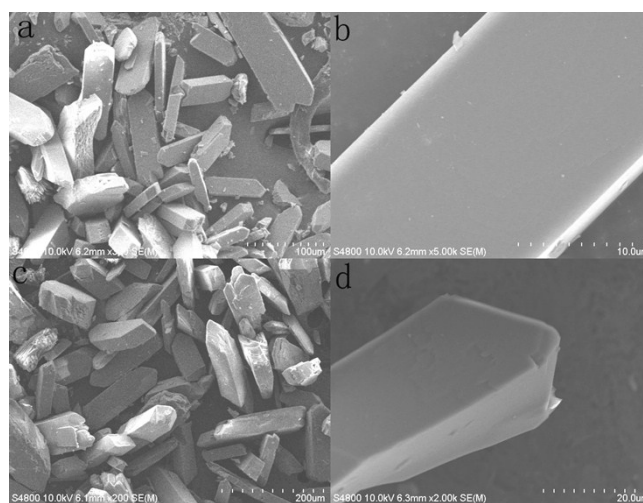

**Fig. S9** SEM images of **1** (a, b) and **1** after exposure to moisture (RH 75%) for 3 days(c, d).

## References

1. G.M.Sheldrick,*Program for Empirical Absorption Correction of Area Data Detector*, University of Göttingen, Germany, 1996.
2. G.M.Sheldrick, SHELXTL Version 5.1, *Bruker Analytical X-ray Instruments Inc.*, Madison, Wisconsin, USA, 1998.
